# Supplementary material for: Evidence of Rabies Virus Exposure among Humans in the Peruvian Amazon
Source: PubMed Central journal article supplement (PMC3414554; doi:10.4269/ajtmh.2012.11-0689), 2012-08-01
Supplement: SD1.pdf [file SD1.pdf]

SUPPLEMENTAL QUESTIONNAIRE  
Knowledge, Attitudes, and Practices Questionnaire

A. HOUSEHOLD INFORMATION

- 1) Household ID number
- 2) GPS
- 3) Municipality
- 4) Community
- 5) Is there someone in the house that can respond to the interview?
  - Yes
  - No
- 6) If there is anyone in the house
  - 6.1) Consent obtained?
    - Yes
    - No
  - 6.2) If consent was NOT obtained
    - 6.2.1) Reason for declining
      - Not interested
      - No time
      - Fear of participating
      - Not capable of consenting
      - Language barrier
      - Other
    - 6.2.2) If the reason is "other"
      - 6.2.2.1) Specify the reason for denying consent
  - 6.3) If consent obtained
    - 6.3.1) How many people live in this home?
    - 6.3.2) How many are females living in this home?
    - 6.3.3) How many children of ages 0–5 live in this house?:
    - 6.3.4) How many children of ages 6–12 live in this house?:
    - 6.3.5) How many children of ages 13–17 live in this house?:
    - 6.3.6) About the house, which is the main material used to build the house?
      - Brick
      - Adobe
      - Wood
      - Canes
      - Cement Block
      - Cement/Concrete
      - Other
    - 6.3.7) If the house is made of another material
      - 6.3.7.1) Specify the other housing material
    - 6.3.8) Does the house have windows/doors that close and prevent bat entry? (Check all that apply)
      - There are open windows
      - Windows can close completely
      - Doors can close completely
      - There are windows or doors that close incompletely and allow entry of bats
      - There are large openings in the walls for ventilation never closed
      - No openings
      - Other: \_\_\_\_\_
      - Don't know
      - Declined to answer
    - 6.3.9) Do you own animals as either pets or livestock?
      - Yes
      - No
      - Don't know
      - Declined to answer
    - 6.3.10) If you own animals as either pets or livestock
      - 6.3.10.1) Do you know or have you seen if your domestic animals (pets/cattle/pigs) have been bitten by bats?
        - Yes
        - No
      - 6.3.10.2) If your domestic animals have been bitten by bats
        - 6.3.10.2.1) Which of your animals have been bitten by bats? (Select all that apply?)
          - Cows
          - Goats
          - Pigs
          - Horses
          - Dogs
          - Cats
          - Chicken
          - Other
        - 6.3.10.2.2) If the bitten animal is "Other"
          - 6.3.10.2.2.1) Specify the animals that have been bitten by bats
      - 6.3.10.3) Do you do anything to avoid your animals/pets being bitten by bats?
        - Nothing
        - Lights on where animals sleep
        - Barriers (nets, close doors)
        - Burn herbs
        - Apply oil/chemicals to animals
        - Hunt bats
        - Blankets
        - Garlic
        - Other
      - 6.3.10.4) If answered OTHER as something that is done to avoid your animals/pets being bitten by bats
        - 6.3.10.4.1) Specify what other thing is done to avoid your animals/pets being bitten by bats
      - 6.3.10.5) Are one or more of your animals vaccinated against rabies?
        - Yes
        - No
        - Don't know
        - Declined to answer
      - 6.3.10.6) Have any of your animals been sick or died due to bats?
        - Yes
        - No
        - Don't know
        - Declined to answer
      - 6.3.10.7) If any of your animals have been sick or died due to an illness that you believe may have been caused by bats?
        - 6.3.10.7.1) What were their signs?
          - Skin rash/discoloration/infection
          - Unusual bleeding (e.g. from nose/mouth)
          - Fever
          - Cough
          - Sneezing
          - Runny nose
          - Chest congestion
          - Muscle pain
          - Difficulty breathing
          - Headache

Convulsions  
Altered mental state (dementia)  
Unconsciousness/coma  
Muscle weakness/paralysis  
Vomiting or diarrhea or stomach cramps  
Miscarriage/stillbirth  
Death  
Multiple animals  
Other  
Don't know

6.3.10.7.2) If one of the signs is "Other"

6.3.10.7.2.1) Specify the other sign

6.3.10.7.3) Is the animal recovered from the symptoms?

Yes  
No  
Don't know  
Decline to answer

6.3.10.7.4) What type of animal was it? (Mark all that apply)

Cows  
Goats  
Pigs  
Horses  
Dogs  
Cats  
Chicken  
Other

7) Are there any dogs in your house?

Yes  
No

7.1) If there are dogs in the house

7.1.1) How many dogs: \_\_\_\_\_

7.1.2) How many female dogs: \_\_\_\_\_

7.1.3) How many male dogs: \_\_\_\_\_

7.1.4) What is the age of the oldest dog in years?: \_\_\_\_

7.1.5) What is the age of the youngest dog?: \_\_\_\_\_

7.1.6) Are the dogs in your house vaccinated against rabies?:

Yes, all of them  
Yes, but only some of them  
No, none of them are vaccinated  
Don't know  
Decline to answer

7.1.6.1) If yes, when was the last vaccination:

Date: \_\_\_\_\_

7.1.7) Have any of the dogs in the house bitten anybody?

Yes  
No  
Don't know  
Decline to answer

7.1.8) Have any of the dogs in the house bitten any of your other animals?

Yes  
No  
Don't know  
Decline to answer

## B. HOUSEHOLD RESPONDENT INFORMATION

1A) Sample ID

1B) Name: First name, First Family name, Second Family name

2) How old are you?

3) Gender

Male  
Female

4) What is the last level of schooling you have completed?

None  
Started primary  
Completed primary  
Started basic  
Completed basic  
Started secondary  
Completed secondary  
Started higher education  
Completed higher education  
Not sure  
Declined to answer

5) How many years have you lived in this house?

Less than one year  
One year  
More than one year

6) If you have lived in this house more than one year

6.1) how many years

7) How many years of experience do you have working/living with or near bats?

None  
5 or less  
6-15  
16-25  
> 25

Don't know

Declined to answer

8) What activities do you engage in that regularly puts you in contact with bats? (check all that applies)

Bat hunting  
Guano collection  
Cattle farming  
Quarry operator  
Agriculture (sugar, coffee, etc.)  
Nightwatchman  
Other

None

Declined to answer

9) If the activity is Other

9.1) Specify

10) Have you been inside of a bat cave or bat refuge (trees, abandoned house, bridge, etc.)?

Yes  
No  
Don't know  
Declined to answer

11) If you have been inside of a bat cave or refuge

11.1) How often do you enter bat caves or bat refuge?

Once per year or less  
2-4 times per year  
5 times or more per year  
Don't know  
Declined to answer

11.2) When was the last time you entered a bat cave or bat refuge?

< 1 month ago  
1-6 months ago  
6-12 months ago  
More than 12 months ago  
Don't know  
Declined to answer

- 12) Have you ever touched a live bat with your skin uncovered?  
 Yes  
 No  
 Don't know  
 Declined to answer
- 13) If you have ever touched a live bat with your skin uncovered  
 13.1) How often do you touch bats?  
 Once per year or less  
 2-4 times per year  
 5 times or more per year  
 Don't know  
 Declined to answer
- 13.2) When was the last time you touched a bat with your skin uncovered?  
 < 1 month ago  
 1-6 months ago  
 6-12 months ago  
 More than 12 months ago  
 Don't know  
 Declined to answer
- 14) Have you ever been scratched by a bat, to your knowledge?  
 Yes  
 No  
 Don't know  
 Declined to answer
- 15) If has been scratched by a bat  
 15.1) How often are you scratched by bats?  
 Once per year or less  
 2-4 times per year  
 5 times or more per year  
 Don't know  
 Declined to answer
- 15.2) When was the last time you were scratched by a bat?  
 < 1 month ago  
 1-6 months ago  
 6-12 months ago  
 More than 12 months ago  
 Don't know  
 Declined to answer
- 16) Have you ever been bitten by a bat, to your knowledge?  
 Yes  
 No  
 Don't know  
 Declined to answer
- 17) If you have been bitten by a bat  
 17.1) How often are you bitten by bats?  
 Once per year or less  
 2-4 times per year  
 5 times or more per year  
 Don't know  
 Declined to answer
- 17.2) When was the last time you were bitten by a bat?  
 < 1 month ago  
 1-6 months ago  
 6-12 months ago  
 More than 12 months ago  
 Don't know  
 Declined to answer
- 18) Have you ever prepared a bat as food?  
 Yes  
 No  
 Don't know  
 Declined to answer
- 19) If you ever prepared a bat as food  
 19.1) How often do you prepare them for eating  
 Once per year or less  
 2-4 times per year  
 5 times or more per year  
 Don't know  
 Declined to answer
- 19.2) When was the last time you prepared one for eating?  
 < 1 month ago  
 1-6 months ago  
 6-12 months ago  
 More than 12 months ago  
 Don't know  
 Declined to answer
- 20) Have you ever eaten a bat?  
 Yes  
 No  
 Don't know  
 Declined to answer
- 21) If you have ever eaten a bat  
 21.1) How often do you eat bats?  
 Once per year or less  
 2-4 times per year  
 5 times or more per year  
 Don't know  
 Declined to answer
- 21.2) When was the last time you ate a bat?  
 < 1 month ago  
 1-6 months ago  
 6-12 months ago  
 More than 12 months ago  
 Don't know  
 Declined to answer
- 22) What kinds of bats do you most frequently observe or have had contact with?  
 Fruit-eating bats  
 Insect-eating bats  
 Vampire bats  
 Multiple types  
 Other  
 Don't know  
 Declined to answer
- 23) If the kind of bat is "Other"  
 23.1) Specify the other type of bat
- 24) Do you or your family do something to avoid bat bites in the house?  
 Nothing  
 Use mosquito net  
 Prevent entry of bat in the house  
 Increase number of cats  
 Increase the number of cattle/pigs to be bitten  
 Destroy bat refuges/kill bats  
 Pray  
 Declined to answer  
 Other
- 25) If answered OTHER as the type of action taken to avoid bites in the house  
 25.1) Specify what you and your family does to avoid bat bites in the house

- 26) How much do you know about rabies?  
 Little to none  
 Basic  
 Extensive  
 Declined to answer
- 27) How dangerous is rabies?  
 Very Severe  
 Mild or moderate  
 Don't know  
 Declined to answer
- 28) How do people get infected with rabies?  
 Animal bite  
 Animal scratch or lick  
 Touching an animal  
 Eating an animal  
 Other  
 Don't know  
 Declined to answer
- 29) If the way people are infected with rabies is "Other"  
 29.1) Specify the way people are infected by rabies
- 30) What animals can be infected with rabies? (check all that apply)  
 Bats  
 Dogs  
 Cats  
 Horses  
 Livestock  
 Wild mammals (not bats)  
 Other  
 Don't know  
 Declined to answer
- 31) If the animals are potentially infected with rabies are "Other"  
 31.1) Specify which other animals could be infected with rabies
- 32) What would you do if you were bitten or scratched by a bat?  
 Nothing  
 Wash wound with soap and water  
 Call a doctor for advice  
 Call or visit a traditional healer  
 Seek medical care at a hospital, clinic or health post  
 Seek rabies PEP  
 Have bat tested for rabies (or other diseases)  
 Other  
 Don't know  
 Declined to answer
- 33) If the action that you would take is Other  
 33.1) Specify the other action that would be taken
- 34) Do you think there is any time of the year in which bats attack more animals or people?  
 No, it is the same all year round  
 Yes, rainy season (April–October)  
 Yes, dry season (November–April)  
 Don't know  
 Declined to answer
- 35) If someone has been bitten by an animal potentially infected with rabies what should that person do? (Check all that apply)  
 Nothing  
 Wash wound with soap and water  
 Call a doctor for advice  
 Call or visit a traditional healer
- Seek medical care at a hospital or clinic  
 Seek rabies post-exposure prophylaxis  
 Check animal's vaccination history  
 Observe animal for a period of time to see if it becomes rabid  
 Have animal tested for rabies  
 Kill animal  
 Other  
 Don't know  
 Declined to answer
- 36) If the action is "Other"  
 36.1) Specify the other action that should be done if someone has been bitten by an animal that might be infected by rabies
- 37) Have you ever been vaccinated against rabies?  
 Yes  
 No  
 Don't know  
 Declined to answer
- 38) If you have ever been vaccinated against rabies  
 38.1) What was the reason you were vaccinated against rabies?  
 Post-exposure prophylaxis  
 Pre-exposure prophylaxis  
 Have received PreEP and PEP  
 Don't know  
 Declined to answer
- 38.2) If you have received rabies vaccination after being bitten or scratched by an animal bite, what animal or animals were responsible for the incident? (check all that apply)  
 Bats  
 Dogs  
 Cats  
 Horses  
 Livestock  
 Wild mammals (not bats)  
 Others  
 Don't know  
 Declined to answer  
 Did not receive PEP
- 38.3) If received a vaccination after being bitten by an OTHER animal  
 38.3.1) Specify the other animal that bit you
- 39) Are you aware if there are any other diseases that humans can get from bats?  
 Yes  
 No  
 Don't know  
 Declined to answer
- 40) Have you or anyone you know ever experienced an illness that you believe may have been caused by bats or being in a bat cave?  
 Yes  
 No  
 Don't know  
 Declined to answer
- 41) If you or anyone you know ever experienced an illness that you believe may have been caused by bats or being in a bat cave  
 41.1) What were the symptoms? (Check all that apply)  
 Skin rash/discoloration/ infection  
 Unusual bleeding (e.g. from nose/mouth)  
 Fever  
 Cough

Sneezing  
Runny nose  
Chest congestion  
Muscle pain  
Difficulty breathing  
Headache  
Convulsions  
Altered mental state (dementia)  
Unconsciousness/coma  
Muscle weakness/paralysis  
Vomiting or diarrhea or stomach cramps  
Miscarriage/stillbirth  
Death  
Multiple persons  
Other  
Don't know  
Declined to answer  
41.2) If the symptoms is "Other"  
41.2.1) Specify the other symptom  
41.2.2) Are you or the person you know that presented symptoms caused by a bat recovered?  
Yes

No  
Don't know  
Decline to answer  
42) We would like to take a sample of your blood. Will you allow us to take a sample?  
Yes  
No  
42.2) Was blood sampled obtained?  
 Yes  
 No  
42.3) IF blood sample was not obtained, why not?  
 Did not consent for blood  
 Was not able to get blood  
 Other: \_\_\_\_\_  
43) Has anyone from your family or living here been in contact, bitten, scratched, eaten, or touched a bat?\*

Yes  
No  
\*Additional persons identified with exposures were surveyed using the questions in Section B. HOUSEHOLD RESPONDENT INFORMATION
